# Supplementary material for: Osteogenic peptides in periodontal ligament stem cell-containing three-dimensional bioscaffolds promote bone healing
Source: Royal Society of Chemistry journal article supplement (doi:10.1039/d1bm01673c), 2022-01-01
Supplement: d1bm01673c4.pdf [file d1bm01673c4.pdf]

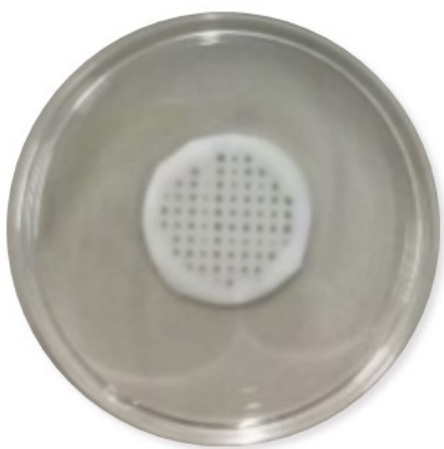

**Figure S1.** A 3D bioscaffold.

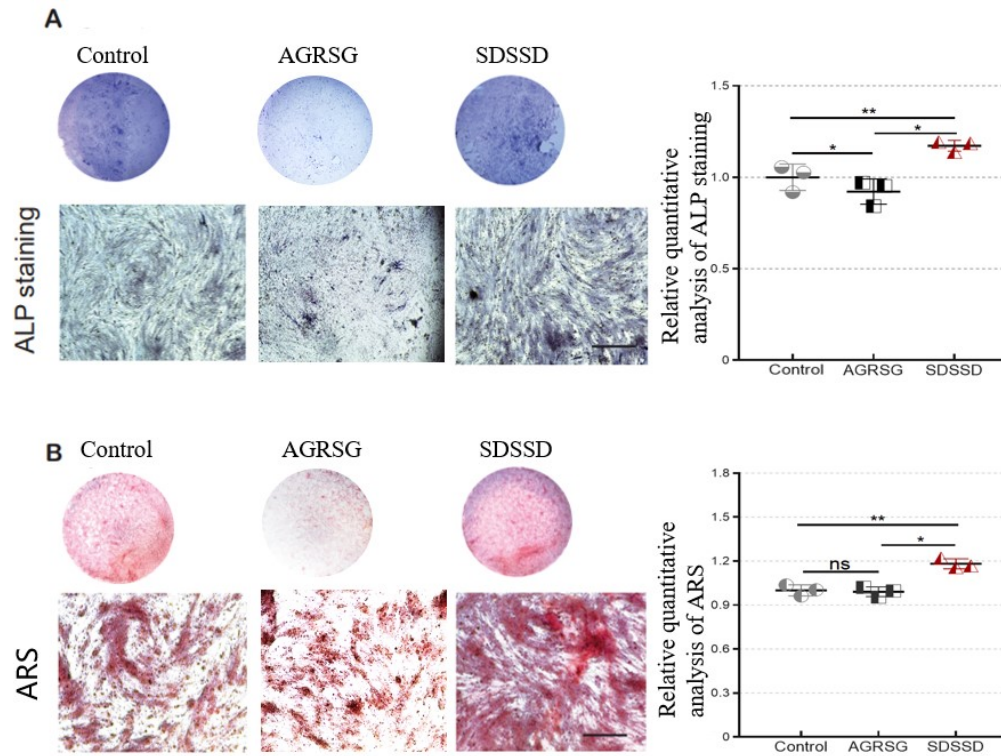

**Figure S2.** Oligopeptide SDSSD promotes osteogenesis of hPDLSCs on tissue culture plastic *in vitro*. **(A)** Representative images and analysis of ALP staining after SDSSD and oligopeptide AGRSG induction for 7 days. N=3. Scale bar, 200  $\mu\text{m}$ . **(B)** Representative images and analysis of ARS after a 3-week SDSSD and oligopeptide AGRSG treatment. N=3. Scale bar, 100  $\mu\text{m}$ . ARS, Alizarin red staining.

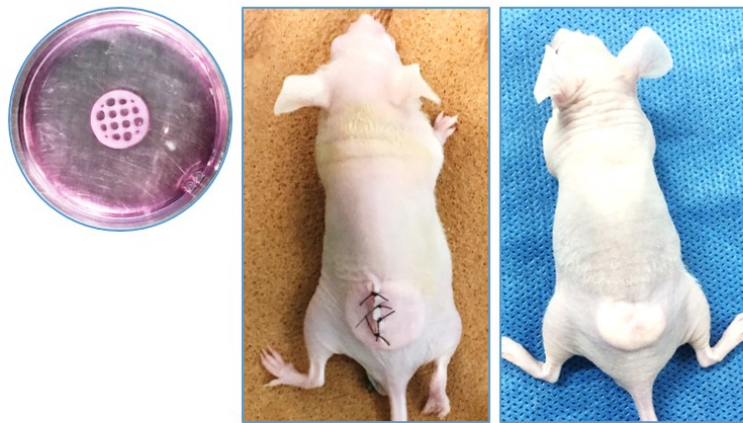

**Figure S3.** Three-dimensional bioscaffolds implanted into subcutaneous bags of nude mice during and 4 weeks after surgery.

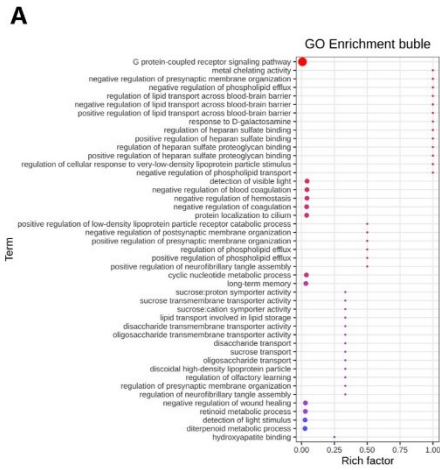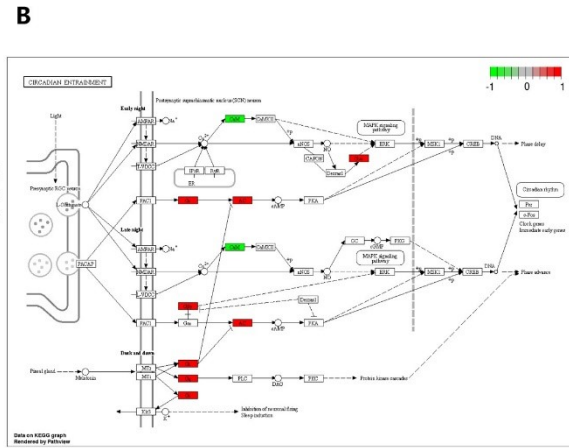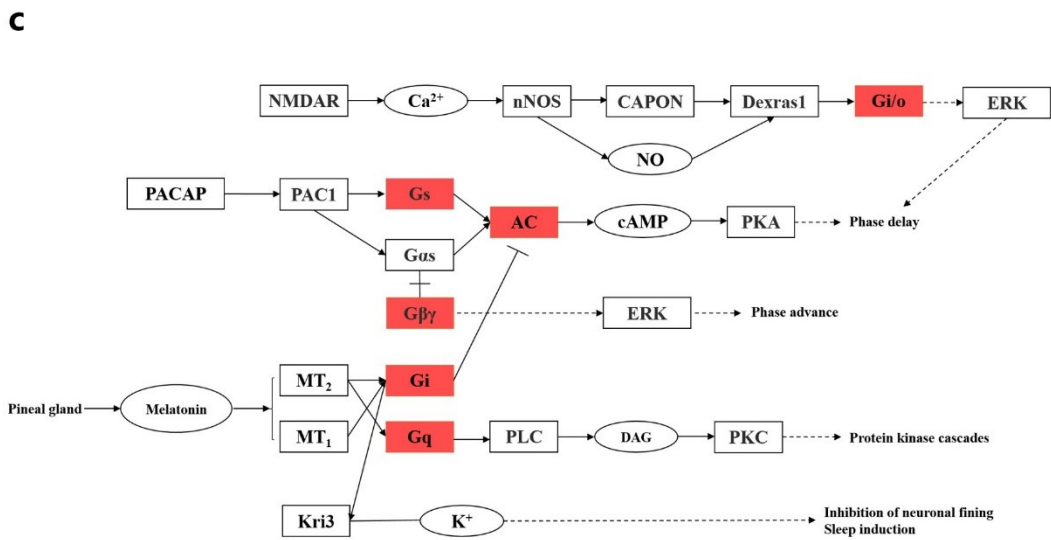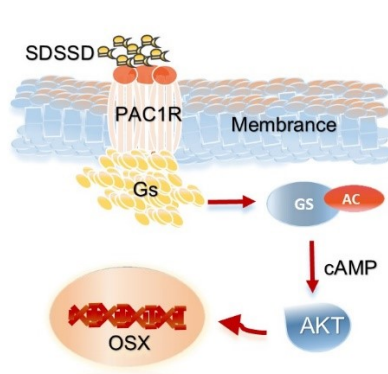

**E**

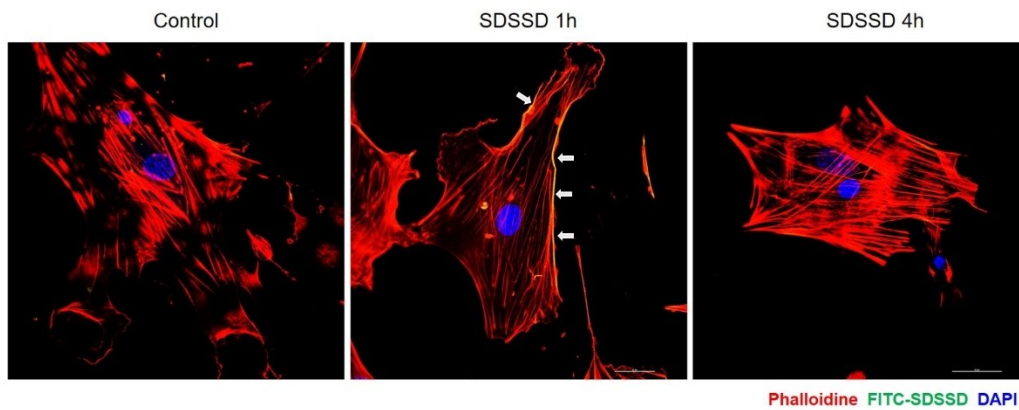

**Figure S4.** Mechanism of SDSSD on the osteogenic differentiation of human periodontal ligament stem cells (hPDLSCs) in bioscaffolds. **(A)** Differentially expressed genes mapped to Gene Ontology categories after 3-day osteogenic induction. **(B)** Kyoto Encyclopedia of Genes and Genomes (KEGG) pathway analysis after 3-day osteogenic induction. **(C)** KEGG analysis of RNA-seq of SDSSD induced hPDLSCs. **(D)** Schematic drawing of the molecular mechanism SDSSD in promoting osteogenesis of hPDLSCs. **(E)** HPDLSC uptake of SDSSD 1 h after 100 ng/mL SDSSD treatment. The yellow line pointed by the white arrow is the binding part of SDSSD. Scale bar, 50  $\mu\text{m}$ .

**Table S1. Primer list for RT-qPCR.**

Supplementary table 1 Primer list of genes for RT-qPCR

| Gene subtype | Oligonucleotide Primers (5'-3')                             |
|--------------|-------------------------------------------------------------|
| OSX          | F: AAGTCTCAAGGTTATAGGGACGG<br>R: CCATGCTTGTCTGGGTATAGTGT    |
| Runx-2       | F: CAGATTACAGATCCCAGGCA<br>R: CATCTGGCTCAGATAGGAGG          |
| OCN          | F: GAGGACCATCTTTCTGCTCACTCT<br>R: TTATTGCCCTCCTGCTTGGA      |
| Dmp-1        | F: AGTGAGTCATCAGAAGAAAGTCAAGC<br>R: CTATACTGGCCTCTGTCGTAGCC |
| Col1a1       | F: TGAAGAACTGGACTGTCCC<br>R: TTTGGTGATACGTATTCTTCCG         |
| GAPDH        | F: CGCATCTTCTTGTGCAGTG<br>R: GACCTTGAGGTCTCCTTGG            |

**Table S2. Primary antibodies for WB and IF staining**

Supplementary table 2 Primer Antibodies

| REAGENT        | SOURCE               | IDENTIFIER     |
|----------------|----------------------|----------------|
| <b>OCN</b>     | Affinity Biosciences | Rabbit,DF12303 |
| <b>Osterix</b> | Affinity Biosciences | Rabbit,DF7731  |
| <b>AKT</b>     | ZENBIO               | Rabbit,342529  |
| <b>p-AKT</b>   | ZENBIO               | Rabbit,310021  |
| <b>ERK</b>     | ZENBIO               | Rabbit,343830  |
| <b>p-ERK</b>   | ZENBIO               | Rabbit,310065  |
| <b>GAPDH</b>   | ZENBIO               | Mouse,200306   |
